# Supplementary material
Source: PubMed Central journal article supplement (PMC275547)
Supplement: nar_31_22_6598__1.pdf [file nar_31_22_6598__1.pdf]

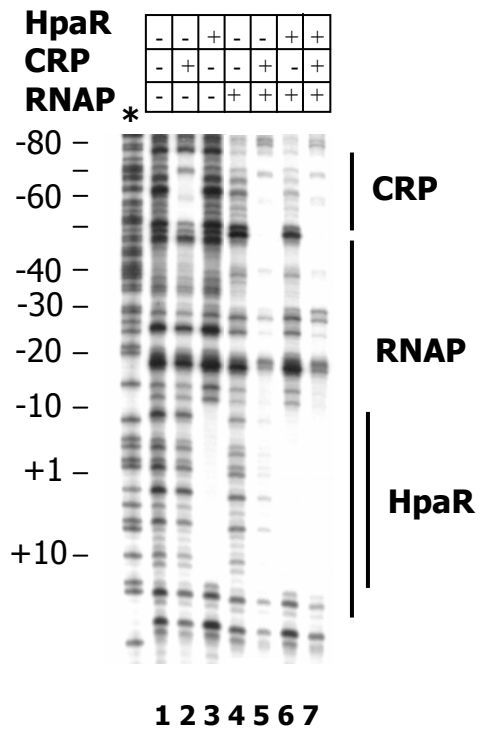

DNase I footprinting analysis of the interaction of HpaR, CRP and RNAP with the *Pg* promoter region. The reaction mixture was treated as described under “Materials and Methods” using as probe the 5'-end-labeled noncoding strand of the *hpaGEDFHI* operon showing the OPR1 binding site, the previously described CRP binding site centered at position -61.5 and the protected region by RNAP. Protein concentrations were always 100 nM. A+ G sequencing ladder is indicated with an asterisk. The presence of each protein is indicated at the top of the figure.
